# Supplementary material for: Interaction of human serum albumin with liposomes of saturated and unsaturated lipids with different phase transition temperatures: a spectroscopic investigation by membrane probe PRODAN
Source: Royal Society of Chemistry journal article supplement (doi:10.1039/c4ra01214c), 2014-01-01
Supplement: c4ra01214c1.pdf [file c4ra01214c1.pdf]

**Interaction of Human Serum Albumin with Liposomes of Saturated and Unsaturated Lipids with  
Different Phase Transition Temperatures: A Spectroscopic Investigation by Membrane Probe  
PRODAN**

**Raina Thakur,<sup>a</sup> Anupam Das<sup>a</sup> and Anjan Chakraborty<sup>a\*</sup>**

**<sup>a</sup>Department of Chemistry,  
Indian Institute of Technology Indore, Madhya Pradesh, India.**

**Supporting information**

**Author to correspondence:**

Dr. Anjan Chakraborty

Email: [anjan@iiti.ac.in](mailto:anjan@iiti.ac.in)

Fax: +91(0)731-2366382

Tel: +91(0)731-2438706

**Table S<sub>1</sub>.** Lifetime components, normalized amplitudes of lifetime components and average lifetime of PRODAN in HSA at 520 nm and 457 nm.<sup>#</sup>

| <b>(<math>\lambda_{em} = 520</math> nm)</b> |                          |                          |                          |                                 |                                 |                                 |                                       |                            |  |
|---------------------------------------------|--------------------------|--------------------------|--------------------------|---------------------------------|---------------------------------|---------------------------------|---------------------------------------|----------------------------|--|
| <b>Conc. Of HSA</b>                         | <b>a<sub>1</sub> (%)</b> | <b>a<sub>2</sub> (%)</b> | <b>a<sub>3</sub> (%)</b> | <b><math>\tau_1</math> (ns)</b> | <b><math>\tau_2</math> (ns)</b> | <b><math>\tau_3</math> (ns)</b> | <b>&lt;<math>\tau</math>&gt; (ns)</b> | <b><math>\chi^2</math></b> |  |
| <b>(<math>\times 10^{-6}</math>M)</b>       |                          |                          |                          |                                 |                                 |                                 |                                       |                            |  |
| 0                                           | 0.74                     | 0.26                     |                          | 0.62                            | 1.80                            |                                 | 0.93                                  | 1.21                       |  |
| 1                                           | 0.79                     | 0.21                     |                          | 0.68                            | 2.24                            |                                 | 1.00                                  | 1.11                       |  |
| 3                                           | 0.79                     | 0.21                     |                          | 0.70                            | 2.70                            |                                 | 1.12                                  | 1.25                       |  |
| 6                                           | 0.78                     | 0.22                     |                          | 0.75                            | 3.24                            |                                 | 1.30                                  | 1.06                       |  |
| 10                                          | 0.74                     | 0.26                     |                          | 0.76                            | 3.52                            |                                 | 1.48                                  | 1.20                       |  |
| 16                                          | 0.68                     | 0.32                     |                          | 0.75                            | 3.71                            |                                 | 1.69                                  | 1.11                       |  |
| 20                                          | 0.66                     | 0.34                     |                          | 0.76                            | 3.83                            |                                 | 1.80                                  | 1.03                       |  |
| 25                                          | 0.63                     | 0.37                     |                          | 0.75                            | 3.89                            |                                 | 1.91                                  | 1.20                       |  |
| 30                                          | 0.61                     | 0.39                     |                          | 0.78                            | 3.97                            |                                 | 2.00                                  | 1.11                       |  |
| 40                                          | 0.57                     | 0.43                     |                          | 0.74                            | 3.96                            |                                 | 2.12                                  | 1.05                       |  |
| 50                                          | 0.55                     | 0.45                     |                          | 0.73                            | 4.03                            |                                 | 2.20                                  | 1.12                       |  |
| <b>(<math>\lambda_{em} = 457</math> nm)</b> |                          |                          |                          |                                 |                                 |                                 |                                       |                            |  |
| 1                                           | 0.55                     | 0.45                     |                          | 0.73                            | 3.60                            |                                 | 2.00                                  | 1.19                       |  |
| 2                                           | 0.46                     | 0.54                     |                          | 0.80                            | 3.65                            |                                 | 2.34                                  | 1.21                       |  |
| 3                                           | 0.43                     | 0.57                     |                          | 0.79                            | 3.68                            |                                 | 2.44                                  | 1.05                       |  |
| 4                                           | 0.40                     | 0.60                     |                          | 0.74                            | 3.66                            |                                 | 2.49                                  | 1.11                       |  |
| 6                                           | 0.36                     | 0.64                     |                          | 0.81                            | 3.70                            |                                 | 2.66                                  | 1.21                       |  |
| 10                                          | 0.34                     | 0.66                     |                          | 0.85                            | 3.75                            |                                 | 2.76                                  | 1.27                       |  |
| 16                                          | 0.34                     | 0.66                     |                          | 0.87                            | 3.78                            |                                 | 2.79                                  | 1.08                       |  |
| 20                                          | 0.33                     | 0.67                     |                          | 0.82                            | 3.80                            |                                 | 2.81                                  | 1.11                       |  |
| 25                                          | 0.33                     | 0.67                     |                          | 0.79                            | 3.80                            |                                 | 2.80                                  | 1.20                       |  |
| 30                                          | 0.33                     | 0.67                     |                          | 0.80                            | 3.85                            |                                 | 2.84                                  | 1.15                       |  |
| 40                                          | 0.33                     | 0.67                     |                          | 0.80                            | 3.95                            |                                 | 2.91                                  | 1.07                       |  |
| 50                                          | 0.33                     | 0.67                     |                          | 0.90                            | 4.00                            |                                 | 3.00                                  | 1.11                       |  |

<sup>#</sup>Estimated error in the measurement is around  $\pm 5\%$

**Table S<sub>2</sub>A.** Lifetime components, normalized amplitudes and average lifetime of PRODAN at different concentration of liposomes at 520 nm.<sup>#</sup>

| <b>Conc. Of DPPC (<math>\times 10^{-3}</math>M) (<math>\lambda_{em} = 520</math> nm)</b> |                          |                          |                          |                                 |                                 |                                 |                                               |                            |
|------------------------------------------------------------------------------------------|--------------------------|--------------------------|--------------------------|---------------------------------|---------------------------------|---------------------------------|-----------------------------------------------|----------------------------|
|                                                                                          | <b>a<sub>1</sub> (%)</b> | <b>a<sub>2</sub> (%)</b> | <b>a<sub>3</sub> (%)</b> | <b><math>\tau_1</math> (ns)</b> | <b><math>\tau_2</math> (ns)</b> | <b><math>\tau_3</math> (ns)</b> | <b><math>\langle \tau \rangle</math> (ns)</b> | <b><math>\chi^2</math></b> |
| 0                                                                                        | 0.74                     | 0.26                     |                          | 0.60                            | 1.8                             |                                 | 0.95                                          | 1.1                        |
| 0.05                                                                                     | 0.82                     | 0.18                     |                          | 0.69                            | 2.60                            |                                 | 1.00                                          | 1.43                       |
| 0.10                                                                                     | 0.63                     | 0.28                     | 0.09                     | 0.57                            | 1.48                            | 4.47                            | 1.16                                          | 1.09                       |
| 0.20                                                                                     | 0.55                     | 0.31                     | 0.14                     | 0.52                            | 1.36                            | 4.73                            | 1.37                                          | 1.04                       |
| 0.30                                                                                     | 0.59                     | 0.22                     | 0.18                     | 0.58                            | 1.61                            | 4.97                            | 1.62                                          | 1.07                       |
| 0.40                                                                                     | 0.59                     | 0.19                     | 0.22                     | 0.61                            | 1.90                            | 5.16                            | 1.84                                          | 1.02                       |
| 0.50                                                                                     | 0.58                     | 0.17                     | 0.25                     | 0.63                            | 2.11                            | 5.23                            | 2.00                                          | 1.04                       |
| 0.60                                                                                     | 0.53                     | 0.16                     | 0.31                     | 0.64                            | 2.17                            | 5.19                            | 2.28                                          | 1.06                       |
| <b>Conc. Of DMPC (<math>\times 10^{-3}</math>M) (<math>\lambda_{em} = 520</math> nm)</b> |                          |                          |                          |                                 |                                 |                                 |                                               |                            |
| 0.025                                                                                    | 0.41                     | 0.46                     | 0.14                     | 0.412                           | 1.00                            | 4.09                            | 1.18                                          | 1.06                       |
| 0.05                                                                                     | 0.51                     | 0.28                     | 0.22                     | 0.524                           | 1.13                            | 4.75                            | 1.60                                          | 1.08                       |
| 0.10                                                                                     | 0.59                     | 0.41                     |                          | 0.605                           | 4.92                            |                                 | 2.36                                          | 1.12                       |
| 0.20                                                                                     | 0.29                     | 0.71                     |                          | 0.583                           | 4.55                            |                                 | 3.40                                          | 1.02                       |
| 0.30                                                                                     | 0.20                     | 0.80                     |                          | 0.577                           | 4.65                            |                                 | 3.83                                          | 1.05                       |
| 0.40                                                                                     | 1                        | -                        |                          | -                               | 4.50                            |                                 | 4.50                                          | 1.20                       |
| 0.50                                                                                     | -0.20                    | 0.80                     |                          | 1.20                            | 4.50                            |                                 | 5.16                                          | 1.16                       |
| 0.60                                                                                     | -0.31                    | 0.69                     |                          | 1.65                            | 4.50                            |                                 | 5.40                                          | 1.12                       |
| <b>Conc. Of DOPC (<math>\times 10^{-3}</math>M) (<math>\lambda_{em} = 520</math> nm)</b> |                          |                          |                          |                                 |                                 |                                 |                                               |                            |
| 0.025                                                                                    | 0.76                     | 0.24                     |                          | 0.668                           | 2.69                            |                                 | 1.15                                          | 1.33                       |
| 0.05                                                                                     | 0.71                     | 0.29                     |                          | 0.685                           | 3.12                            |                                 | 1.40                                          | 1.27                       |
| 0.10                                                                                     | 0.57                     | 0.43                     |                          | 0.670                           | 3.42                            |                                 | 1.87                                          | 1.07                       |
| 0.20                                                                                     | 0.33                     | 0.67                     |                          | 0.568                           | 3.59                            |                                 | 2.58                                          | 1.02                       |
| 0.30                                                                                     | 0.21                     | 0.79                     |                          | 0.631                           | 3.6                             |                                 | 2.98                                          | 1.00                       |
| 0.40                                                                                     | 0.16                     | 0.84                     |                          | 0.879                           | 3.6                             |                                 | 3.16                                          | 1.02                       |
| 0.50                                                                                     | -                        | 1.00                     |                          | -                               | 3.6                             |                                 | 3.60                                          | 1.10                       |
| 0.60                                                                                     | -                        | 1.00                     |                          | -                               | 3.52                            |                                 | 3.52                                          | 1.20                       |
| <b>Conc. Of POPC (<math>\times 10^{-3}</math>M) (<math>\lambda_{em} = 520</math> nm)</b> |                          |                          |                          |                                 |                                 |                                 |                                               |                            |
| 0.025                                                                                    | 0.78                     | 0.22                     |                          | 0.674                           | 2.64                            |                                 | 1.11                                          | 1.2                        |
| 0.05                                                                                     | 0.75                     | 0.25                     |                          | 0.698                           | 3.14                            |                                 | 1.31                                          | 1.21                       |
| 0.10                                                                                     | 0.66                     | 0.34                     |                          | 0.676                           | 3.56                            |                                 | 1.66                                          | 1.06                       |
| 0.20                                                                                     | 0.46                     | 0.54                     |                          | 0.603                           | 3.81                            |                                 | 2.32                                          | 1.06                       |
| 0.30                                                                                     | 0.33                     | 0.67                     |                          | 0.641                           | 3.78                            |                                 | 2.74                                          | 1.12                       |
| 0.40                                                                                     | 0.31                     | 0.69                     |                          | 0.746                           | 3.83                            |                                 | 2.87                                          | 1.00                       |
| 0.50                                                                                     | 0.28                     | 0.72                     |                          | 0.834                           | 3.83                            |                                 | 2.99                                          | 1.05                       |
| 0.60                                                                                     | -                        | 1.00                     |                          | -                               | 3.38                            |                                 | 3.38                                          | 1.25                       |

<sup>#</sup>Estimated error in the measurement is around  $\pm 5\%$

**Table S<sub>2</sub>B.** Lifetime components, normalized amplitudes of lifetime components and average lifetime of PRODAN at different concentration of liposomes at 435 nm.<sup>#</sup>

| <b>Conc. Of DPPC (<math>\times 10^{-3}</math>M) (<math>\lambda_{em} = 435</math> nm)</b> |                          |                          |                          |                                 |                                 |                                 |                                               |                            |
|------------------------------------------------------------------------------------------|--------------------------|--------------------------|--------------------------|---------------------------------|---------------------------------|---------------------------------|-----------------------------------------------|----------------------------|
|                                                                                          | <b>a<sub>1</sub> (%)</b> | <b>a<sub>2</sub> (%)</b> | <b>a<sub>3</sub> (%)</b> | <b><math>\tau_1</math> (ns)</b> | <b><math>\tau_2</math> (ns)</b> | <b><math>\tau_3</math> (ns)</b> | <b><math>\langle \tau \rangle</math> (ns)</b> | <b><math>\chi^2</math></b> |
| 0                                                                                        |                          |                          |                          |                                 |                                 |                                 |                                               |                            |
| 0.05                                                                                     | 0.40                     | 0.60                     |                          | 1.19                            | 6.08                            |                                 |                                               | 1.31                       |
| 0.10                                                                                     | 0.18                     | 0.30                     | 0.52                     | 0.45                            | 2.26                            | 6.47                            | 4.11                                          | 1.25                       |
| 0.20                                                                                     | 0.16                     | 0.30                     | 0.53                     | 0.45                            | 2.26                            | 6.47                            | 4.19                                          | 1.30                       |
| 0.30                                                                                     | 0.17                     | 0.31                     | 0.53                     | 0.47                            | 2.45                            | 6.53                            | 4.27                                          | 1.17                       |
| 0.40                                                                                     | 0.15                     | 0.31                     | 0.54                     | 0.48                            | 2.42                            | 6.48                            | 4.34                                          | 1.21                       |
| 0.50                                                                                     | 0.16                     | 0.31                     | 0.52                     | 0.62                            | 2.73                            | 6.61                            | 4.41                                          | 1.10                       |
| 0.60                                                                                     | 0.17                     | 0.31                     | 0.52                     | 0.62                            | 2.73                            | 6.57                            | 4.39                                          | 1.20                       |
| <b>Conc. Of DMPC (<math>\times 10^{-3}</math>M) (<math>\lambda_{em} = 435</math> nm)</b> |                          |                          |                          |                                 |                                 |                                 |                                               |                            |
| 0.025                                                                                    | 0.18                     | 0.34                     | 0.48                     | 0.59                            | 1.89                            | 4.51                            | 2.91                                          | 1.28                       |
| 0.05                                                                                     | 0.19                     | 0.31                     | 0.49                     | 0.72                            | 2.03                            | 4.47                            | 2.98                                          | 1.22                       |
| 0.10                                                                                     | 0.15                     | 0.30                     | 0.55                     | 0.75                            | 1.78                            | 4.33                            | 3.00                                          | 1.30                       |
| 0.20                                                                                     | 0.25                     | 0.25                     | 0.50                     | 1.03                            | 2.36                            | 4.43                            | 3.00                                          | 1.09                       |
| 0.30                                                                                     | 0.16                     | 0.27                     | 0.57                     | 0.85                            | 1.80                            | 4.26                            | 3.00                                          | 1.17                       |
| 0.40                                                                                     | 0.19                     | 0.29                     | 0.52                     | 0.85                            | 2.04                            | 4.35                            | 3.00                                          | 1.25                       |
| 0.50                                                                                     | 0.18                     | 0.28                     | 0.54                     | 0.90                            | 1.99                            | 4.31                            | 3.00                                          | 1.11                       |
| 0.60                                                                                     | 0.14                     | 0.31                     | 0.55                     | 0.74                            | 1.77                            | 4.25                            | 3.00                                          | 1.09                       |
| <b>Conc. Of DOPC (<math>\times 10^{-3}</math>M) (<math>\lambda_{em} = 435</math> nm)</b> |                          |                          |                          |                                 |                                 |                                 |                                               |                            |
| 0.025                                                                                    | 0.70                     | 0.30                     |                          | 0.84                            | 2.62                            |                                 | 1.37                                          | 1.25                       |
| 0.05                                                                                     | 0.69                     | 0.31                     |                          | 0.83                            | 2.57                            |                                 | 1.37                                          | 1.29                       |
| 0.10                                                                                     | 0.69                     | 0.31                     |                          | 0.87                            | 2.63                            |                                 | 1.42                                          | 1.21                       |
| 0.20                                                                                     | 0.68                     | 0.32                     |                          | 0.87                            | 2.61                            |                                 | 1.43                                          | 1.10                       |
| 0.30                                                                                     | 0.68                     | 0.32                     |                          | 0.87                            | 2.62                            |                                 | 1.43                                          | 1.20                       |
| 0.40                                                                                     | 0.68                     | 0.32                     |                          | 0.88                            | 2.63                            |                                 | 1.44                                          | 1.05                       |
| 0.50                                                                                     | 0.69                     | 0.31                     |                          | 0.88                            | 2.65                            |                                 | 1.43                                          | 1.13                       |
| 0.60                                                                                     | 0.69                     | 0.31                     |                          | 0.86                            | 2.69                            |                                 | 1.43                                          | 1.23                       |
| <b>Conc. Of POPC (<math>\times 10^{-3}</math>M) (<math>\lambda_{em} = 435</math> nm)</b> |                          |                          |                          |                                 |                                 |                                 |                                               |                            |
| 0.025                                                                                    | 0.61                     | 0.39                     |                          | 0.84                            | 2.59                            |                                 | 1.52                                          | 1.31                       |
| 0.05                                                                                     | 0.60                     | .40                      |                          | 0.84                            | 2.59                            |                                 | 1.54                                          | 1.28                       |
| 0.10                                                                                     | 0.61                     | 0.39                     |                          | 0.87                            | 2.64                            |                                 | 1.56                                          | 1.21                       |
| 0.20                                                                                     | 0.59                     | 0.41                     |                          | 0.86                            | 2.63                            |                                 | 1.58                                          | 1.24                       |
| 0.30                                                                                     | 0.60                     | 0.40                     |                          | 0.87                            | 2.64                            |                                 | 1.58                                          | 1.19                       |
| 0.40                                                                                     | 0.61                     | 0.39                     |                          | 0.87                            | 2.65                            |                                 | 1.56                                          | 1.07                       |
| 0.50                                                                                     | 0.60                     | 0.40                     |                          | 0.86                            | 2.63                            |                                 | 1.57                                          | 1.11                       |
| 0.60                                                                                     | 0.60                     | 0.40                     |                          | 0.86                            | 2.62                            |                                 | 1.56                                          | 1.10                       |

<sup>#</sup>Estimated error in the measurement is around  $\pm 5\%$

**Table S<sub>3</sub>A.** Lifetime components, normalized amplitudes of lifetime components and average lifetime of PRODAN in DPPC and DMPC liposomes as a function of concentration of HSA. The decays were measured at the emission maxima following Figure 7.<sup>#</sup>

| [HSA] ( $\mu\text{M}$ ) | $a_1$ (%) | $a_2$ (%) | $a_3$ (%) | $\tau_1$ (ns) | $\tau_2$ (ns) | $\tau_3$ (ns) | $\langle\tau\rangle$ (ns) | $\chi^2$ |
|-------------------------|-----------|-----------|-----------|---------------|---------------|---------------|---------------------------|----------|
| <b>DPPC liposomes</b>   |           |           |           |               |               |               |                           |          |
| 0                       | 0.15      | 0.31      | 0.54      | 0.62          | 2.73          | 6.57          | 4.49                      | 1.10     |
| 0.5                     | 0.15      | 0.30      | 0.55      | 0.42          | 2.518         | 6.66          | 4.43                      | 1.16     |
| 1                       | 0.18      | 0.32      | 0.50      | 0.50          | 2.485         | 6.44          | 4.37                      | 1.10     |
| 2                       |           | 0.42      | 0.58      |               | 2.00          | 6.30          | 4.49                      | 1.08     |
| 4                       |           | 0.43      | 0.57      |               | 1.900         | 6.00          | 4.24                      | 1.10     |
| 6                       |           | 0.44      | 0.56      |               | 1.800         | 5.86          | 4.08                      | 1.17     |
| 8                       |           | 0.41      | 0.59      |               | 1.840         | 5.89          | 4.23                      | 1.11     |
| 10                      |           | 0.47      | 0.53      |               | 1.860         | 5.80          | 3.95                      | 1.04     |
| 12                      |           | 0.48      | 0.52      |               | 1.802         | 5.61          | 3.78                      | 1.14     |
| 16                      |           | 0.47      | 0.53      |               | 1.714         | 5.34          | 3.63                      | 1.15     |
| 20                      |           | 0.44      | 0.56      |               | 1.780         | 5.11          | 3.64                      | 1.15     |
| 25                      |           | 0.46      | 0.54      |               | 1.750         | 5.05          | 3.53                      | 1.12     |
| 30                      |           | 0.45      | 0.55      |               | 1.650         | 5.01          | 3.50                      | 1.19     |
| 35                      |           | 0.41      | 0.59      |               | 1.600         | 4.81          | 3.49                      | 1.10     |
| 40                      |           | 0.42      | 0.58      |               | 1.560         | 4.73          | 3.40                      | 1.17     |
| 50                      |           | 0.40      | 0.60      |               | 1.480         | 4.60          | 3.35                      | 1.2      |
| <b>DMPC liposomes</b>   |           |           |           |               |               |               |                           |          |
| 0                       | 0.34      | 0.66      |           | 2.20          | 4.54          |               | 3.75                      | 1.20     |
| 0.5                     | 0.32      | 0.68      |           | 2.00          | 4.45          |               | 3.63                      | 1.21     |
| 1                       | 0.30      | 0.70      |           | 1.62          | 4.35          |               | 3.53                      | 1.24     |
| 2                       | 0.29      | 0.71      |           | 1.55          | 4.31          |               | 3.51                      | 1.20     |
| 4                       | 0.29      | 0.71      |           | 1.49          | 4.30          |               | 3.48                      | 1.29     |
| 6                       | 0.29      | 0.71      |           | 1.43          | 4.27          |               | 3.45                      | 1.30     |
| 8                       | 0.30      | 0.70      |           | 1.47          | 4.28          |               | 3.44                      | 1.22     |
| 10                      | 0.29      | 0.71      |           | 1.41          | 4.24          |               | 3.42                      | 1.22     |
| 12                      | 0.30      | 0.70      |           | 1.40          | 4.23          |               | 3.38                      | 1.25     |
| 16                      | 0.29      | 0.71      |           | 1.22          | 4.16          |               | 3.31                      | 1.30     |
| 20                      | 0.30      | 0.70      |           | 1.16          | 4.17          |               | 3.27                      | 1.25     |
| 25                      | 0.29      | 0.71      |           | 1.08          | 4.13          |               | 3.24                      | 1.25     |
| 30                      | 0.30      | 0.70      |           | 1.10          | 4.14          |               | 3.23                      | 1.21     |
| 40                      | 0.29      | 0.71      |           | 1.12          | 4.10          |               | 3.23                      | 1.26     |
| 50                      | 0.29      | 0.71      |           | 1.12          | 4.10          |               | 3.23                      | 1.30     |

<sup>#</sup>Estimated error in the measurement is around  $\pm 5\%$

**Table S<sub>3</sub>B.** Lifetime components, normalized amplitudes of lifetime components and average lifetime of PRODAN in POPC and DOPC liposomes as a function of concentration of HSA. The decays were measured at the emission maxima following Figure 7.<sup>#</sup>

| [HSA] ( $\mu\text{M}$ ) | $a_1$ (%) | $a_2$ (%) | $a_3$ (%) | $\tau_1$ (ns) | $\tau_2$ (ns) | $\tau_3$ (ns) | $\langle\tau\rangle$ (ns) | $\chi^2$ |
|-------------------------|-----------|-----------|-----------|---------------|---------------|---------------|---------------------------|----------|
| <b>POPC liposomes</b>   |           |           |           |               |               |               |                           |          |
| 0                       | 1         |           |           | 3.77          |               |               | 3.70                      | 1.1      |
| 0.5                     | 1         |           |           | 3.77          |               |               | 3.70                      | 1.12     |
| 1                       | 1         |           |           | 3.77          |               |               | 3.70                      | 1.12     |
| 2                       | 1         |           |           | 3.750         |               |               | 3.75                      | 1.16     |
| 4                       | 1         |           |           | 3.80          |               |               | 3.80                      | 1.2      |
| 6                       | 0.06      | 0.94      |           | 0.86          | 3.81          |               | 3.63                      | 1.22     |
| 8                       | 0.081     | 0.92      |           | 0.93          | 3.84          |               | 3.61                      | 1.20     |
| 10                      | 0.14      | 0.86      |           | 1.00          | 3.82          |               | 3.43                      | 1.19     |
| 12                      | 0.18      | 0.82      |           | 0.86          | 3.85          |               | 3.31                      | 1.21     |
| 16                      | 0.25      | 0.75      |           | 0.79          | 3.85          |               | 3.10                      | 1.25     |
| 20                      | 0.29      | 0.71      |           | 0.80          | 3.90          |               | 3.00                      | 1.24     |
| 25                      | 0.33      | 0.67      |           | 0.79          | 3.95          |               | 2.90                      | 1.20     |
| 30                      | 0.34      | 0.66      |           | 0.85          | 3.90          |               | 2.92                      | 1.25     |
| 40                      | 0.32      | 0.68      |           | 0.75          | 3.90          |               | 2.90                      | 1.27     |
| 50                      | 0.35      | 0.65      |           | 0.95          | 3.90          |               | 2.93                      | 1.26     |
| <b>DOPC liposomes</b>   |           |           |           |               |               |               |                           |          |
| 0                       | 1.00      |           |           | 3.49          |               |               | 3.49                      | 1.16     |
| 0.5                     | 1.00      |           |           | 3.49          |               |               | 3.49                      | 1.20     |
| 1                       | 1.00      |           |           | 3.45          |               |               | 3.49                      | 1.22     |
| 2                       | 1.00      |           |           | 3.49          |               |               | 3.50                      | 1.21     |
| 4                       | 0.11      | 0.89      |           | 1.92          | 3.63          |               | 3.44                      | 1.20     |
| 6                       | 0.16      | 0.84      |           | 1.72          | 3.68          |               | 3.37                      | 1.25     |
| 8                       | 0.20      | 0.80      |           | 1.68          | 3.70          |               | 3.30                      | 1.24     |
| 10                      | 0.22      | 0.78      |           | 1.68          | 3.75          |               | 3.29                      | 1.29     |
| 12                      | 0.19      | 0.81      |           | 1.00          | 3.64          |               | 3.15                      | 1.30     |
| 16                      | 0.22      | 0.76      |           | 0.89          | 3.64          |               | 2.96                      | 1.35     |
| 20                      | 0.27      | 0.73      |           | 0.82          | 3.66          |               | 2.89                      | 1.30     |
| 25                      | 0.30      | 0.70      |           | 0.75          | 3.65          |               | 2.78                      | 1.27     |
| 30                      | 0.31      | 0.69      |           | 0.75          | 3.73          |               | 2.80                      | 1.29     |
| 40                      | 0.35      | 0.65      |           | 0.75          | 3.78          |               | 2.72                      | 1.29     |
| 50                      | 0.35      | 0.65      |           | 0.75          | 3.77          |               | 2.71                      | 1.31     |

<sup>#</sup>Estimated error in the measurement is around  $\pm 5\%$
